# Supplementary material for: Self-reactive germline-like TCR alpha chains shared between blood and pancreas
Source: Research Square preprint supplement (doi:10.21203/rs.3.rs-3446917/v1), 2023-10-20
Supplement: Supplementary file 2 [file c01e7a3630351db8dafb38e6.xlsx]

## Sheet: Table S4
Table S4. Antibodies for flow cytometry.
Florophore	Ab	Clone	Supplier	Titer
FITC	SLAM6	REA339	Miltenyi	200
PerCP-Cy5.5	CD8	SK1	BD Pharmigen	100
PerCP-Cy5.5	CD19	HIB19	Biolegend	100
PerCP-Cy5.5	CD14	61D3	eBioscience	100
PerCP-Cy5.5	CD56	B159	BD Pharmigen	100
PerCP-Cy5.5	iNKT	6B11	Biolegend	100
PerCP-Cy5.5	CD161	HP-3G10	Biolegend	100
Viaprobe	Live/Dead		BD Pharmigen	20
BV421	CCR4	L291H4	Biolegend	100
BV510	CCR6	11A9	BD Horizon	100
BV605	CD4	RPA-T4	Biolegend	200
BV650	CD3	UCHT1	Biolegend	100
BV711	CD45RO	UCHL1	Biolegend	100
BV785	CD95	DX2	Biolegend	100
PE	CD154	5C8	Miltenyi	200
PE-Vio615	CXCR3	REA232	Miltenyi	100
PE-Vio770	CD38	IB6	Miltenyi	50
APC	CD69	FN50	Biolegend	200
R718	CD45RA	HI100	BD Horizon	500
APC-Cy7	CCR7	G043H7	Biolegend	50
BUV395	CD2	RPA-2	BD Horizon	25
BUV737	CD25	2A3	BD Horizon	200
