# Supplementary material for: Self-reactive germline-like TCR alpha chains shared between blood and pancreas
Source: Research Square preprint supplement (doi:10.21203/rs.3.rs-3446917/v1), 2023-10-20
Supplement: Supplementary file 3 [file c5864530871b083a7092983c.xlsx]

## Sheet: PIT_matched_TCRs_w_chain_seqs_m
														Sequences				No.peptide contacts (residues <5 Å)
MHCiiA	MHCiiB	pepName	pepSeq	PITmatch	CloneID	TRA junction	TRB junction	traLen	prbLen	fullTRAseq	fullTRBseq	jobID	topScore	TRA_CDR1	TRA_CDR2	TRB_CDR1	TRB_CDR2	TRA cdr1	TRA cdr2	TRA cdr3	TRB cdr1	TRB cdr2	TRB cdr3	otherTRA	otherTRB
DRB1*0401	DRA*0101	GAD65 377-396	HKWKLSGVERANSVTWNPHK	TRUE	Clone_109	CAATTDKLIF	CASSLAYGTHRYNEQFF	10	17	DQQVKQNSPSLSVQEGRISILNCDYTNSMFDYFLWYKKYPAEGPTFLISISSIKDKNEDGRFTVFLNKSAKHLSLHIVPSQPGDSAVYFCAATTDKLIFGTGTRLQVFP	GAGVSQSPSNKVTEKGKDVELRCDPISGHTALYWYRQSLGQGLEFLIYFQGNSAPDKSGLPSDRFSAERTGGSVSTLTIQRTQQEDSAVYLCASSLAYGTHRYNEQFFGPGTRLTVL	MHC2TA9_230720_103408	0.82	NSMFDY	ISSIKDK	SGHTA	FQGNSA	5	0	2	1	2	8	0	0
DRB1*0401	DRA*0101	GAD65_113-132	DVMNILLQYVVKSFDRSTKV	TRUE	Clone_640	CAAAGNQFYF	CASSFTYNEQFF	10	12	KNEVEQSPQNLTAQEGEFITINCSYSVGISALHWLQQHPGGGIVSLFMLSSGKKKHGRLIATINIQEKHSSLHITASHPRDSAVYICAAAGNQFYFGTGTSLTVIP	DAGVIQSPRHEVTEMGQEVTLRCKPISGHDYLFWYRQTMMRGLELLIYFNNNVPIDDSGMPEDRFSAKMPNASFSTLKIQPSEPRDSAVYFCASSFTYNEQFFGPGTRLTVL	MHC2DL4_230710_182340	0.87	VGISA	LSSGK	SGHDY	FNNNVP	4	0	3	3	1	4	0	0
DRB1*0401	DRA*0101	IGRP_305-324	QLYHFLQIPTHEEHLFYVLS	TRUE	Clone_2356	CAGQTGANNLFF	CASSQEVGTVPNQPQHF	12	17	GQQVMQIPQYQHVQEGEDFTTYCNSSTTLSNIQWYKQRPGGHPVFLIQLVKSGEVKKQKRLTFQFGEAKKNSSLHITATQTTDVGTYFCAGQTGANNLFFGTGTRLTVIP	ETGVTQTPRHLVMGMTNKKSLKCEQHLGHNAMYWYKQSAKKPLELMFVYSLEERVENNSVPSRFSPECPNSSHLFLHLHTLQPEDSALYLCASSQEVGTVPNQPQHFGDGTRLSIL	MHC23XR_230710_235628	0.86	TTLSN	LVKSGEV	LGHNA	YSLEER	1	0	4	1	1	8	1	1
DRB1*0401	DRA*0101	ZNT8 1-20	MEFLERTYLVNDKAAKMYAF	TRUE	Clone_1826	CAENRSDYKLSF	CASSSQGQGKETQYF	12	15	GESVGLHLPTLSVQEGDNSIINCAYSNSASDYFIWYKQESGKGPQFIIDIRSNMDKRQGQRVTVLLNKTVKHLSLQIAATQPGDSAVYFCAENRSDYKLSFGAGTTVTVRA	DVKVTQSSRYLVKRTGEKVFLECVQDMDHENMFWYRQDPGLGLRLIYFSYDVKMKEKGDIPEGYSVSREKKERFSLILESASTNQTSMYLCASSSQGQGKETQYFGPGTRLLVL	MHC29DG_230720_155459	0.91	NSASDY	IRSNMDK	MDHEN	SYDVKM	5	0	5	2	0	6	0	1
DRB1*0401	DRA*0101	GAD65 265-284	KGMAALPRLIAFTSEHSHFS	FALSE	Clone_478	CAVRDMRGAGSYQLTF	CASSLGTGTGVYEQYF	16	16	AQSVAQPEDQVNVAEGNPLTVKCTYSVSGNPYLFWYVQYPNRGLQFLLKYITGDNLVKGSYGFEAEFNKSQTSFHLKKPSALVSDSALYFCAVRDMRGAGSYQLTFGKGTKLSVIP	NAGVTQTPKFQVLKTGQSMTLQCAQDMNHEYMSWYRQDPGMGLRLIHYSVGAGITDQGEVPNGYNVSRSTTEDFPLRLLSAAPSQTSVYFCASSLGTGTGVYEQYFGPGTRLTVT	MHC2YE9_230719_125855	0.83	VGISA	LSSGK	MNHEY	SVGAGI	0	0	8	2	0	5	0	0
DRB1*0401	DRA*0101	GAD65 553-572	KVNFFRMVISNPAATHQDID	FALSE	Clone_578	CAVGAGYGGATNKLIF	CASSFRGGGNPYEQYF	16	16	AQSVTQPDIHITVSEGASLELRCNYSYGATPYLFWYVQSPGQGLQLLLKYFSGDTLVQGIKGFEAEFKRSQSSFNLRKPSVHWSDAAEYFCAVGAGYGGATNKLIFGTGTLLAVQP	DAGVIQSPRHEVTEMGQEVTLRCKPISGHNSLFWYRQTMMRGLELLIYFNNNVPIDDSGMPEDRFSAKMPNASFSTLKIQPSEPRDSAVYFCASSFRGGGNPYEQYFGPGTRLTVT	MHC2TMR_230719_130548	0.85	YGATPY	YFSGDTLV	SGHNS	FNNNVP	6	0	6	1	2	6	1	0
DRB1*0401	DRA*0101	IGRP_305-324	QLYHFLQIPTHEEHLFYVLS	FALSE	Clone_5	CAVRDSFSGGYQKVTF	CASSPLAGAWSYEQYF	16	16	AQSVAQPEDQVNVAEGNPLTVKCTYSVSGNPYLFWYVQYPNRGLQFLLKYITGDNLVKGSYGFEAEFNKSQTSFHLKKPSALVSDSALYFCAVRDSFSGGYQKVTFGTGTKLQVIP	DAGVIQSPRHEVTEMGQEVTLRCKPISGHDYLFWYRQTMMRGLELLIYFNNNVPIDDSGMPEDRFSAKMPNASFSTLKIQPSEPRDSAVYFCASSPLAGAWSYEQYFGPGTRLTVT	MHC24Q6_230710_235928	0.81	VSGNPY	YITGDNLV	SGHDY	FNNNVP	2	0	7	0	0	5	1	0
DRB1*0401	DRA*0101	IGRP_305-324	QLYHFLQIPTHEEHLFYVLS	FALSE	Clone_2353	CILRDTISNFGNEKLTF	CASSFGSSYYGYTF	17	14	DAKTTQPNSMESNEEEPVHLPCNHSTISGTDYIHWYRQLPSQGPEYVIHGLTSNVNNRMASLAIAEDRKSSTLILHRATLRDAAVYYCILRDTISNFGNEKLTFGTGTRLTIIP	DTGVSQDPRHKITKRGQNVTFRCDPISEHNRLYWYRQTLGQGPEFLTYFQNEAQLEKSRLLSDRFSAERPKGSFSTLEIQRTEQGDSAMYLCASSFGSSYYGYTFGSGTRLTVV	MHC23WK_230710_235515	0.79	TISGTDY	GLTSN	SEHNR	FQNEAQ	1	0	6	2	2	4	0	0
DRB1*0401	DRA*0101	ZNT8 266-285	ILKDFSILLMEGVPKSLNYS	FALSE	Clone_110	CAASIGGGGSYIPTF	CASSLAGTDTQYF	15	13	GENVEQHPSTLSVQEGDSAVIKCTYSDSASNYFPWYKQELGKGSQLIIDIRSNVGEKKDQRIAVTLNKTAKHFSLHITETQPEDSAVYFCAASIGGGGSYIPTFGRGTSLIVHP	GAGVSQTPSNKVTEKGKYVELRCDPISGHTALYWYRQSLGQGPEFLIYFQGTGAADDSGLPNDRFFAVRPEGSVSTLKIQRTERGDSAVYLCASSLAGTDTQYFGPGTRLTVL	MHC20U2_230720_155612	0.88	DSASNY	IRSNVGE	SGHTA	FQGTGA	2	0	7	2	1	4	0	0
DRB1*0401	DRA*0101	GAD65 353-372	ICKKYKIWMHVDAAWGGGLL	FALSE	Clone_2312	CAMREMNQAGTALIF	CASTKGGTHQPQHF	15	14	QKITQTQPGMFVQEKEAVTLDCTYDTSDQSYGLFWYKQPSSGEMIFLIYQGSYDEQNATEGRYSLNFQKARKSANLVISASQLGDSAMYFCAMREMNQAGTALIFGKGTTLSVSS	NAGVTQTPKFRVLKTGQSMTLLCAQDMNHEYMYWYRQDPGMGLRLIHYSVGEGTTAKGEVPDGYNVSRLKKQNFLLGLESAAPSQTSVYFCASTKGGTHQPQHFGDGTRLSIL	MHC27M1_230720_113813	0.87	TSDQSYG	QGSYDEQN	MNHEY	SVGEGT	0	0	4	2	0	3	0	1
DRB1*0401	DRA*0101	GAD65_113-132	DVMNILLQYVVKSFDRSTKV	TRUE	Clone_667	CAERLYGNNRLAF	CASTLLWGGDSYEQYF	13	16	GEDVEQSLFLSVREGDSSVINCTYTDSSSTYLYWYKQEPGAGLQLLTYIFSNMDMKQDQRLTVLLNKKDKHLSLRIADTQTGDSAIYFCAERLYGNNRLAFGKGNQVVVIP	NAGVTQTPKFQVLKTGQSMTLQCAQDMNHNSMYWYRQDPGMGLRLIYYSASEGTTDKGEVPNGYNVSRLNKREFSLRLESAAPSQTSVYFCASTLLWGGDSYEQYFGPGTRLTVT	MHC2VY2_230710_182848	0.84	DSSSTY	IFSNMDM	MNHNS	SASEGT	3	0	6	2	0	7	0	1
DRB1*0401	DRA*0101	GAD65_113-132	DVMNILLQYVVKSFDRSTKV	TRUE	Clone_2062	CAVQAGNAGNMLTF	CASASGVVGELFF	14	13	EDQVTQSPEALRLQEGESSSLNCSYTVSGLRGLFWYRQDPGKGPEFLFTLYSAGEEKEKERLKATLTKKESFLHITAPKPEDSATYLCAVQAGNAGNMLTFGGGTRLMVKP	GAGVSQSPRYKVTKRGQDVALRCDPISGHVSLYWYRQALGQGPEFLTYFNYEAQQDKSGLPNDRFSAERPEGSISTLTIQRTEQRDSAMYRCASASGVVGELFFGEGSRLTVL	MHC2GEH_230710_183139	0.89	VSGLRG	LYSAGEE	SGHVS	FNYEAQ	4	0	4	1	1	3	1	0
DRB1*0401	DRA*0101	GAD65_113-132	DVMNILLQYVVKSFDRSTKV	FALSE	Clone_262	CAMEGGRYNTPLVF	CASSVNRGHNTEAFF	14	15	QKEVEQDPGPLSVPEGAIVSLNCTYSNSAFQYFMWYRQYSRKGPELLMYTYSSGNKEDGRFTAQVDKSSKYISLFIRDSQPSDSATYLCAMEGGRYNTPLVFGKGTRLSVIA	DAGVTQSPTHLIKTRGQQVTLRCSPKSGHDTVSWYQQALGQGPQFIFQYYEEEERQRGNFPDRFSGHQFPNYSSELNVNALLLGDSALYLCASSVNRGHNTEAFFGQGTRLTVV	MHC2O5X_230711_093113	0.8	NSAFQY	TYSSGN	SGHDT	YYEEEE	2	0	3	1	2	5	0	0
DRB1*0401	DRA*0101	GAD65_113-132	DVMNILLQYVVKSFDRSTKV	TRUE	Clone_271	CAVQAGNAGNMLTF	CASSLGVTGELFF	14	13	EDQVTQSPEALRLQEGESSSLNCSYTVSGLRGLFWYRQDPGKGPEFLFTLYSAGEEKEKERLKATLTKKESFLHITAPKPEDSATYLCAVQAGNAGNMLTFGGGTRLMVKP	GAGVSQSPRYKVTKRGQDVALRCDPISGHVSLYWYRQALGQGPEFLTYFNYEAQQDKSGLPNDRFSAERPEGSISTLTIQRTEQRDSAMYRCASSLGVTGELFFGEGSRLTVL	MHC2KAA_230710_182238	0.88	VSGLRG	LYSAGEE	SGHVS	FNYEAQ	4	0	4	1	1	4	0	0
DRB1*0401	DRA*0101	GAD65_113-132	DVMNILLQYVVKSFDRSTKV	FALSE	Clone_2073	CAVKLQGGSEKLVF	CASKYNRGEQPQHF	14	14	AQSVTQLDSQVPVFEEAPVELRCNYSSSVSVYLFWYVQYPNQGLQLLLKYLSGSTLVESINGFEAEFNKSQTSFHLRKPSVHISDTAEYFCAVKLQGGSEKLVFGKGTKLTVNP	EPEVTQTPSHQVTQMGQEVILRCVPISNHLYFYWYRQILGQKVEFLVSFYNNEISEKSEIFDDQFSVERPDGSNFTLKIRSTKLEDSAMYFCASKYNRGEQPQHFGDGTRLSIL	MHC2L9R_230711_123523	0.86	SSVSVY	YLSGSTLV	SNHLY	FYNNEI	4	0	5	2	2	4	1	0
DRB1*0401	DRA*0101	GAD65_113-132	DVMNILLQYVVKSFDRSTKV	FALSE	Clone_904	CALSDYSGTSYGKLTF	CASSLIPYNEQFF	16	13	GDSVTQMEGPVTLSEEAFLTINCTYTATGYPSLFWYVQYPGEGLQLLLKATKADDKGSNKGFEATYRKETTSFHLEKGSVQVSDSAVYFCALSDYSGTSYGKLTFGQGTILTVHP	EAGVAQSPRYKIIEKRQSVAFWCNPISGHATLYWYQQILGQGPKLLIQFQNNGVVDDSQLPKDRFSAERLKGVDSTLKIQPAKLEDSAVYLCASSLIPYNEQFFGPGTRLTVL	MHC2ZBC_230710_183025	0.83	ATGYPS	ATKADDK	SGHAT	FQNNGV	3	0	5	3	2	4	0	0
DRB1*0401	DRA*0101	IGRP 241-260	KWCANPDWIHIDTTPFAGLV	TRUE	Clone_855A	CVVSVGTNAGKSTF	CASSFSGELFF	14	11	AQSVTQLDSHVSVSEGTPVLLRCNYSSSYSPSLFWYVQHPNKGLQLLLKYTSAATLVKGINGFEAEFKKSETSFHLTKPSAHMSDAAEYFCVVSVGTNAGKSTFGDGTTLTVKP	EAGVVQSPRYKIIEKKQPVAFWCNPISGHNTLYWYRQNLGQGPELLIRYENEEAVDDSQLPKDRFSAERLKGVDSTLKIQPAELGDSAVYLCASSFSGELFFGEGSRLTVL	MHC2SDV_230720_111146	0.85	SSYSPS	YTSAATLV	SGHNT	YENEEA	3	0	5	1	3	1	1	0
DRB1*0401	DRA*0101	IGRP 241-260	KWCANPDWIHIDTTPFAGLV	TRUE	Clone_855B	CATDEGGSYIPTF	CASSFSGELFF	14	11	SQQGEEDPQALSIQEGENATMNCSYKTSINNLQWYRQNSGRGLVHLILIRSNEREKHSGRLRVTLDTSKKSSSLLITASRAADTASYFCATDEGGSYIPTFGRGTSLIVHP	EAGVVQSPRYKIIEKKQPVAFWCNPISGHNTLYWYRQNLGQGPELLIRYENEEAVDDSQLPKDRFSAERLKGVDSTLKIQPAELGDSAVYLCASSFSGELFFGEGSRLTVL	MHC29CH_230720_111423	0.88	TSINN	IRSNERE	SGHNT	YENEEA	4	1	4	1	3	2	1	0
DRB1*0401	DRA*0101	IGRP 241-260	KWCANPDWIHIDTTPFAGLV	TRUE	Clone_896	CAVNPNQAGTALIF	CASAPQEAQPQHF	14	13	QKEVEQNSGPLSVPEGAIASLNCTYSDRGSQSFFWYRQYSGKSPELIMSIYSNGDKEDGRFTAQLNKASQYVSLLIRDSQPSDSATYLCAVNPNQAGTALIFGKGTTLSVSS	NAGVTQTPKFRILKIGQSMTLQCAQDMNHNYMYWYRQDPGMGLKLIYYSVGAGITDKGEVPNGYNVSRSTTEDFPLRLELAAPSQTSVYFCASAPQEAQPQHFGDGTRLSIL	MHC2N00_230720_111541	0.89	DRGSQS	IYSNGD	MNHNY	SVGAGI	2	0	6	4	0	5	1	0
DRB1*0401	DRA*0101	IGRP 241-260	KWCANPDWIHIDTTPFAGLV	FALSE	Clone_971	CAVEDLNQAGTALIF	CASSLALGQGNQQFF	15	15	KDQVFQPSTVASSEGAVVEIFCNHSVSNAYNFFWYLHFPGCAPRLLVKGSKPSQQGRYNMTYERFSSSLLILQVREADAAVYYCAVEDLNQAGTALIFGKGTTLSVSS	KAGVTQTPRYLIKTRGQQVTLSCSPISGHRSVSWYQQTPGQGLQFLFEYFSETQRNKGNFPGRFSGRQFSNSRSEMNVSTLELGDSALYLCASSLALGQGNQQFFGPGTRLTVL	MHC2AVR_230720_111801	0.89	VSNAYN	GSKP	SGHRS	YFSETQ	2	0	5	1	2	5	0	0
DRB1*0401	DRA*0101	IGRP_305-324	QLYHFLQIPTHEEHLFYVLS	TRUE	Clone_29	CAATRTSGTYKYIF	CASSPWGAGGTDTQYF	14	16	DQQVKQNSPSLSVQEGRISILNCDYTNSMFDYFLWYKKYPAEGPTFLISISSIKDKNEDGRFTVFLNKSAKHLSLHIVPSQPGDSAVYFCAATRTSGTYKYIFGTGTRLKVLA	NAGVTQTPKFRILKIGQSMTLQCTQDMNHNYMYWYRQDPGMGLKLIYYSVGAGITDKGEVPNGYNVSRSTTEDFPLRLELAAPSQTSVYFCASSPWGAGGTDTQYFGPGTRLTVL	MHC26CT_230710_235720	0.88	NSMFDY	ISSIKDK	MNHNY	SVGAGI	1	0	6	3	0	5	0	0
DRB1*0401	DRA*0101	IGRP_305-324	QLYHFLQIPTHEEHLFYVLS	FALSE	Clone_300	CATDSSSGSARQLTF	CASSLVGGRVDWREQYF	15	17	SQQGEEDPQALSIQEGENATMNCSYKTSINNLQWYRQNSGRGLVHLILIRSNEREKHSGRLRVTLDTSKKSSSLLITASRAADTASYFCATDSSSGSARQLTFGSGTQLTVLP	KAGVTQTPRYLIKTRGQQVTLSCSPISGHRSVSWYQQTPGQGLQFLFEYFSETQRNKGNFPGRFSGRQFSNSRSEMNVSTLELGDSALYLCASSLVGGRVDWREQYFGPGTRLTVT	MHC2K32_230720_001643	0.74	TSINN	IRSNERE	SGHRS	YFSETQ	0	0	4	1	2	5	0	0
DRB1*0401	DRA*0101	ZNT8 1-20	MEFLERTYLVNDKAAKMYAF	TRUE	Clone_1662	CAASGANSGYALNF	CAWSAQGETQYF	14	12	GENVEQHPSTLSVQEGDSAVIKCTYSDSASNYFPWYKQELGKRPQLIIDIRSNVGEKKDQRIAVTLNKTAKHFSLHITETQPEDSAVYFCAASGANSGYALNFGKGTSLLVTP	SQTIHQWPATLVQPVGSPLSLECTVEGTSNPNLYWYRQAAGRGLQLLFYSVGIGQISSEVPQNLSASRPQDRQFILSSKKLLLSDSGFYLCAWSAQGETQYFGPGTRLLVL	MHC22GM_230720_173438	0.89	DSASNY	IRSNVGE	GTSNPN	SVGIG	3	0	7	1	2	5	0	0
DRB1*0401	DRA*0101	ZNT8 266-285	ILKDFSILLMEGVPKSLNYS	FALSE	Clone_295	CAESTSGSARQLTF	CAWMGGYNEQFF	14	12	GEDVEQSLFLSVREGDSSVINCTYTDSSSTYLYWYKQEPGAGLQLLTYIFSNMDMKQDQRLTVLLNKKDKHLSLRIADTQTGDSAIYFCAESTSGSARQLTFGSGTQLTVLP	SQTIHQWPATLVQPVGSPLSLECTVEGTSNPNLYWYRQAAGRGLQLLFYSVGIGQISSEVPQNLSASRPQDRQFILSSKKLLLSDSGFYLCAWMGGYNEQFFGPGTRLTVL	MHC2YHL_230720_172734	0.87	DSSSTY	IFSNMDM	GTSNPN	SVGIG	4	0	6	1	0	2	0	0
DRB1*0401	DRA*0101	GAD65 377-396	HKWKLSGVERANSVTWNPHK	TRUE	Clone_81	CAASRYSGGGADGLTF	CASSPQGGNTEAFF	16	14	DQQVKQNSPSLSVQEGRISILNCDYTNSMFDYFLWYKKYPAEGPTFLISISSIKDKNEDGRFTVFLNKSAKHLSLHIVPSQPGDSAVYFCAASRYSGGGADGLTFGKGTHLIIQP	DAGVIQSPRHEVTEMGQEVTLRCKPISGHDYLFWYRQTMMRGLELLIYFNNNVPIDDSGMPEDRFSAKMPNASFSTLKIQPSEPRDSAVYFCASSPQGGNTEAFFGQGTRLTVV	MHC2881_230731_201931	0.88	NSMFDY	ISSIKDK	SGHDY	FNNNVP	4	0	5	2	2	2	0	0
DRB1*0401	DRA*0101	GAD65 377-396	HKWKLSGVERANSVTWNPHK	TRUE	Clone_140	CAASNPDYKLSF	CASSFTEGNTEAFF	12	14	QQQVKQSPQSLIVQKGGISIINCAYENTAFDYFPWYQQFPGKGPALLIAIRPDVSEKKEGRFTISFNKSAKQFSLHIMDSQPGDSATYFCAASNPDYKLSFGAGTTVTVRA	KAGVTQTPRYLIKTRGQQVTLSCSPISGHRSVSWYQQTPGQGLQFLFEYFSETQRNKGNFPGRFSGRQFSNSRSEMNVSTLELGDSALYLCASSFTEGNTEAFFGQGTRLTVV	MHC2X8H_230731_202035	0.78	NTAFDY	IRPDVSE	SGHRS	YFSETQ	2	0	4	1	4	3	0	2
DRB1*0401	DRA*0101	GAD65 273-292	LIAFTSEHSHFSLKKGAAAL	FALSE	Clone_244	CAASEPDKLIF	CASSSQGANYGYTF	11	14	QQQVKQSPQSLIVQKGGISIINCAYENTAFDYFPWYQQFPGKGPALLIAIRPDVSEKKEGRFTISFNKSAKQFSLHIMDSQPGDSATYFCAASEPDKLIFGTGTRLQVFP	EAQVTQNPRYLITVTGKKLTVTCSQNMNHEYMSWYRQDPGLGLRQIYYSMNVEVTDKGDVPEGYKVSRKEKRNFPLILESPSPNQTSLYFCASSSQGANYGYTFGSGTRLTVV	MHC2UBX_230731_202322	0.88	NTAFDY	IRPDVSE	MNHEY	SMNVEV	3	1	2	3	2	5	0	1
DRB1*0401	DRA*0101	GAD65 113-132	DVMNILLQYVVKSFDRSTKV	FALSE	Clone_839	CATDEGGSYIPTF	CASSFSGELFF	13	11	SQQGEEDPQALSIQEGENATMNCSYKTSINNLQWYRQNSGRGLVHLILIRSNEREKHSGRLRVTLDTSKKSSSLLITASRAADTASYFCATDEGGSYIPTFGRGTSLIVHP	EAGVVQSPRYKIIEKKQPVAFWCNPISGHNTLYWYRQNLGQGPELLIRYENEEAVDDSQLPKDRFSAERLKGVDSTLKIQPAELGDSAVYLCASSFSGELFFGEGSRLTVL	MHC2T1K_230731_202544	0.87	TSINN	IRSNERE	SGHNT	YENEEA	4	0	5	3	2	2	0	1
DRB1*0401	DRA*0101	IGRP 241-260	KWCANPDWIHIDTTPFAGLV	TRUE	Clone_855	CVVSVGTNAGKSTF	CASSFSGELFF	14	11	AQSVTQLDSHVSVSEGTPVLLRCNYSSSYSPSLFWYVQHPNKGLQLLLKYTSAATLVKGINGFEAEFKKSETSFHLTKPSAHMSDAAEYFCVVSVGTNAGKSTFGDGTTLTVKP	EAGVVQSPRYKIIEKKQPVAFWCNPISGHNTLYWYRQNLGQGPELLIRYENEEAVDDSQLPKDRFSAERLKGVDSTLKIQPAELGDSAVYLCASSFSGELFFGEGSRLTVL	MHC2PPR_230731_202435	0.84	SSYSPS	YTSAATLV	SGHNT	YENEEA	3	0	6	1	3	1	1	0
DRB1*0401	DRA*0101	GAD65 377-396	HKWKLSGVERANSVTWNPHK	TRUE	Clone_566	CAASRYSGGGADGLTF	CASSVQGGNTEAFF	16	14	DQQVKQNSPSLSVQEGRISILNCDYTNSMFDYFLWYKKYPAEGPTFLISISSIKDKNEDGRFTVFLNKSAKHLSLHIVPSQPGDSAVYFCAASRYSGGGADGLTFGKGTHLIIQP	DAGVIQSPRHEVTEMGQEVTLRCKPISGHDYLFWYRQTMMRGLELLIYFNNNVPIDDSGMPEDRFSAKMPNASFSTLKIQPSEPRDSAVYFCASSVQGGNTEAFFGQGTRLTVV	MHC24VU_230731_202141	0.88	NSMFDY	ISSIKDK	SGHDY	FNNNVP	4	0	6	2	2	4	0	0
